# Supplementary material for: The participatory development of a national core set of person-centred diabetes outcome constructs for use in routine diabetes care across healthcare sectors
Source: PubMed Central journal article supplement (PMC8434700; doi:10.1186/s40900-021-00309-7), 2021-09-10
Supplement: 40900_2021_309_MOESM2_ESM.pdf [file 40900_2021_309_MOESM2_ESM.pdf]

Additional file 2 – Participants in national working group meeting

|                                      |                                                                                                                                                                                                                                                                                                                                                     |
|--------------------------------------|-----------------------------------------------------------------------------------------------------------------------------------------------------------------------------------------------------------------------------------------------------------------------------------------------------------------------------------------------------|
| <p>Advocacy and user perspective</p> | <p>Representative from the National Office of the Danish Diabetes Association (representing a national membership of PWD and FM in Denmark)</p> <p>Experienced user representative with Type 1 diabetes, co-designer of study</p> <p>Experienced user representative with Type 2 diabetes, co-designer of study</p>                                 |
| <p>Senior diabetes physicians</p>    | <p>North Denmark: 5 senior diabetes specialist physicians; 1 did not attend in-person</p> <p>South Denmark: 2 senior diabetes specialist physicians; 1 did not attend in-person</p> <p>Central Denmark: 1 senior diabetes specialist physician</p> <p>Capital Region: 1 senior diabetes specialist physician, head; Did not attending in-person</p> |
| <p>Senior diabetes nurses</p>        | <p>North Denmark: 1 section head diabetes nurse and 1 senior diabetes specialist nurse</p> <p>Central Denmark: 1 senior specialist diabetes nurse, did not attend in-person.</p>                                                                                                                                                                    |
| <p>Health care payer</p>             | <p>North Denmark Health Region: 1 Senior head, VBHC diabetes program sponsor, 1 Data and Health Economist regional project manager,</p>                                                                                                                                                                                                             |
| <p>National health authorities</p>   | <p>1 representative of the PRO secretariat of the National Health Data Board authorities</p>                                                                                                                                                                                                                                                        |

Additional file 2 – Participants in national working group meeting

|                        |                                                                                                                 |
|------------------------|-----------------------------------------------------------------------------------------------------------------|
| Municipality care      | Municipality, Northern Denmark: 1 specialist manager, municipality health promotion and rehabilitation services |
| Primary care physician | Primary care practice: Senior general practitioner and primary care research coordinator                        |
| Outcome researchers    | 1 senior PRO diabetes research scientist<br>1 health economist researcher                                       |

Participants in national working group meeting on diabetes outcomes constructs
